1  
2  
3  
4  
5  
6  
7  
8  
9  
10  
11  
12  
13  
14  
15  
16  
17  
18  
19  
20  
21  
22  
23  
24

Article - Resources

**Genome-wide disruption of DNA methylation by 5-aza-2'-deoxycytidine in a parasitoid wasp**

Nicola Cook<sup>1¶\*</sup>, Darren J Parker<sup>2,3¶</sup>, Frances Turner<sup>4</sup>, Eran Tauber<sup>5</sup>, Bart A Pannebakker<sup>6</sup> and David M Shuker<sup>1</sup>

- 1. School of Biology, University of St Andrews, UK
- 2. Department of Ecology and Evolution, University of Lausanne, Switzerland
- 3. Swiss Institute of Bioinformatics, Lausanne, Switzerland
- 4. Edinburgh Genomics, School of Biological Sciences, University of Edinburgh, UK
- 5. Faculty of Natural Sciences, University of Haifa, Israel
- 6. Laboratory of Genetics, Wageningen University, The Netherlands

\*Corresponding author  
E-mail: [nc52@st-andrews.ac.uk](mailto:nc52@st-andrews.ac.uk)

¶These authors contributed equally

25 **Abstract**

26 DNA methylation of cytosine residues across the genome influences how many genes and phenotypes  
27 are regulated. As such, understanding the role of DNA methylation and other epigenetic mechanisms  
28 has become very much a part of mapping genotype to phenotype, a major question in evolutionary  
29 biology. Ideally, we would like to manipulate DNA methylation patterns on a genome-wide scale, to  
30 elucidate the role of epigenetic modifications in phenotypic expression. Recently, the demethylating  
31 agent 5-aza-2'-deoxycytidine (5-aza-dC; commonly used in the epigenetic treatment of certain  
32 cancers), has been deployed to explore the epigenetic regulation of a number of traits of interest to  
33 evolutionary ecologists. Recently, we showed that treatment with 5-aza-dC shifted patterns of sex  
34 allocation as predicted by genomic conflict theory in the parasitoid wasp *Nasonia vitripennis*. This was  
35 the first (albeit indirect) experimental evidence for genomic conflict over sex allocation facilitated by  
36 DNA methylation. However, this work lacked confirmation of the effects of 5-aza-dC on DNA  
37 methylation, drawing commentary on the efficacy of 5-aza-dC in a novel system. Here, using whole-  
38 genome bisulphite sequencing, we demonstrate unequivocally that 5-aza-dC disrupts methylation  
39 across the *Nasonia vitripennis* genome. We show that disruption leads to both hypo- and hyper-  
40 methylation, may vary across tissues and time of sampling, and that the effects of 5-aza-dC are  
41 context- and sequence specific. We conclude that 5-aza-dC has the potential to be repurposed as a  
42 tool in evolutionary ecology for studying the role of DNA methylation.

43

44

45

46

47

48

49

50

51

## 52 Introduction

53 The genomics revolution has transformed our understanding of how genomes build phenotypes. The  
54 extraordinary diversity of morphologies, behaviours, and physiological adaptations we see across the  
55 natural world are not necessarily the product of different sets of genes, or different numbers of genes  
56 in organisms, but rather differences in how, where and when genes are expressed during  
57 development. The genomics revolution has therefore been as much about understanding gene  
58 regulation as it has been about identifying allelic variants at genetic loci (Biémont 2010, Ashbrook *et*  
59 *al.* 2018). At the forefront of our growing knowledge of gene regulation has been the role of epigenetic  
60 modification of DNA, including DNA methylation. In the vast majority of cases, DNA methylation occurs  
61 at the C5 position of the cytosine ring in CpG dinucleotides and is catalysed by DNA methyltransferase  
62 enzymes (Dnmts). Three types of Dnmt are known in eukaryotes; Dnmt3 establishes DNA methylation  
63 patterns *de novo*, Dnmt1 maintains these patterns, and Dnmt2 is involved in tRNA methylation (Lyko  
64 2018). In mammals, broadly, DNA methylation is found throughout the genome (except at CpG islands  
65 near the promoters of genes) and is associated with transcriptional repression (Feng *et al.* 2010,  
66 Zemach *et al.* 2010). By contrast, in insects, DNA methylation is concentrated in gene bodies and is  
67 associated with more stable patterns of gene expression (Bewick *et al.* 2017). Notably, vertebrate and  
68 invertebrate DNA methylation varies greatly in its extent throughout the genome, with the proportion  
69 of methylated CpGs much lower in invertebrates: 0-14% as compared to 60-90% in mammals (Bewick  
70 *et al.* 2017, Glastad *et al.* 2011). The evolutionary reasons for these differences are not yet clear,  
71 although it is thought that gene body methylation is an ancient feature of eukaryote genomes (Zemach  
72 *et al.* 2010). However, DNA methylation status influences how genes (and phenotypes) are expressed  
73 in many organisms, including reproductive vs non-reproductive worker bumblebees (Amarasinghe *et*  
74 *al.* 2014), caste differentiation in honey bees (Kucharski *et al.* 2008, Lyko *et al.* 2010),  
75 transgenerational response to the presence of predators in *Daphnia magna* (Schield *et al.* 2016), and  
76 between lateral plate morphotypes in Threespine Stickleback (Smith *et al.* 2014). Therefore, DNA  
77 methylation patterns are very much part of mapping genotypes to phenotypes.

78 The flexible control of gene expression provided by mechanisms such as DNA methylation has  
79 also caught the interest of biologists interested in the underlying mechanisms of phenotypic plasticity,  
80 and how such plasticity may evolve (Bonduriansky and Day 2009, 2018). Moreover, there has also  
81 been great interest in the extent to which epigenetic modifications may be inherited across  
82 generations (Bonduriansky and Day 2009, Burggren 2016, Lind and Spagopoulou 2018). Transmission  
83 of epigenetic state allows transmission of parent-of-origin information, or so-called genomic  
84 imprinting, setting the scene for genomic conflict (Haig 2002, Patten *et al.* 2014). Genomic conflict  
85 arises when maternally- and paternally-inherited alleles have different evolutionary optima for traits

86 expressed in an individual (Haig 1997, 2002). A classic example is the expression of maternally- or  
87 paternally-inherited alleles during embryonic development in mammals: paternally-inherited alleles  
88 are selected to extract more resources from the mother *in utero* compared to maternally-inherited  
89 alleles (Moore and Haig 1991). This conflict is now known to be, at least in part, facilitated by parent-  
90 of-origin specific gene expression of insulin-like growth factor II (Igf2) and Igf2r. In mammals, the Igf2  
91 gene promotes growth and cellular differentiation during development, and also regulates the  
92 placental supply of nutrients and the demand of nutrients by the foetus (Constancia *et al.* 2002).

93 To further understand the role epigenetic modifications such as DNA methylation have in  
94 influencing phenotypes and their evolution, we need robust ways of manipulating them. Here we  
95 consider the efficacy of the chemical 5-aza-2'-deoxycytidine (5-aza-dC) as a way of manipulating DNA  
96 methylation, using the parasitoid wasp *Nasonia vitripennis*. The extent and nature of DNA methylation  
97 across the *N. vitripennis* genome has recently been characterised (Wang *et al.* 2013, Pegoraro *et al.*  
98 2016), and the presence in the genome of a full "methylation toolkit" has also been confirmed (Werren  
99 *et al.* 2010). 5-aza-dC is well-known from the cancer literature as a hypomethylating agent and is used  
100 in the treatment of acute myeloid leukaemia and myelodysplastic syndrome (Bryan *et al.* 2011,  
101 Momparler 2012, Seelan *et al.* 2018). In cancer patients, many genes that suppress leukemogenesis in  
102 humans are silenced by aberrant DNA methylation. 5-aza-dC acts as a demethylating agent to  
103 reactivate these genes (see below for details of action). In recent years, 5-aza-dC has been used across  
104 a range of species as an experimental tool to explore how DNA methylation influences phenotypes  
105 including diapause in *Nasonia vitripennis* (Pegoraro *et al.* 2016) and worker reproductive status in  
106 bumble bees (Amarasinghe *et al.* 2014). Previously, we used 5-aza-dC to explore whether DNA  
107 methylation was involved in the control of facultative sex allocation in *N. vitripennis* (Cook *et al.* 2015).

108 Like all Hymenoptera, *N. vitripennis* is haplodiploid, with males arising from unfertilised  
109 haploid eggs and females arising from fertilised diploid eggs. Females have putative control over the  
110 sex of their offspring, releasing sperm to produce daughters or not to produce sons. Female *Nasonia*  
111 allocate sex broadly in line with the predictions of Local Mate Competition theory (Hamilton 1967,  
112 Taylor and Bulmer 1980, Werren 1980, Werren 1983, Shuker and West 2004, Burton-Chellew *et al.*  
113 2008; reviewed by West 2009). Females laying eggs alone on their blowfly pupae hosts produce very  
114 female-biased offspring sex ratios to minimise competition amongst her sons for mating  
115 opportunities. As more females (foundresses) lay eggs on the same host(s) together, females produce  
116 less female-biased sex ratios, as LMC is reduced and the fitness gained through the production of sons  
117 and daughters moves towards equality (Hamilton 1967). When treated with 5-aza-dC, the facultative  
118 sex allocation response in female *Nasonia* was maintained, suggesting that this plastic behaviour in  
119 and of itself did not require certain patterns of methylation. Rather, the sex ratios (as proportion male)

120 produced by females were shifted slightly upwards, with more sons produced by treated females than  
121 by controls. This subtle shift is as predicted by genomic conflict over sex allocation theory, which  
122 requires some form of genomic imprinting (Wild and West 2008). Assuming that DNA methylation is  
123 the mechanism by which parent-of-origin allelic information is carried in *Nasonia* (although see Wang  
124 *et al.* 2016), our data therefore provided the first (albeit indirect) evidence for genomic conflict  
125 influencing sex allocation (Cook *et al.* 2015a).

126 Recently, Ellers *et al.* (2019) challenged the effects of 5-aza-dC as a general modifier of  
127 methylation status, considering CpGs in nine genes in *Nasonia vitripennis*. Ellers *et al.* (2009) failed to  
128 find changes in methylation status across any of the 155 CpGs in their study, questioning the action of  
129 5-aza-dC in *Nasonia*, and hence of course the interpretation of the effects of 5-aza-dC in our earlier  
130 study (Cook *et al.* 2015a). Fully negative results are of course very hard to interpret, but Ellers *et al.*  
131 (2009) nonetheless raised valid concerns of the efficacy of the chemical. As noted above, levels of  
132 methylation in insects are generally low, and a genome-wide study would provide greater resolution  
133 to explore the effects of this chemical in an ecologically valuable model system. Here we consider the  
134 effects of 5-aza-dC across the whole genome using a Bisulfite sequencing (BS-Seq) experiment. There  
135 is evidence to suggest that the effects of 5-aza-dC are unlikely to be random across methylated CpGs  
136 in a given genome. For instance, in mammals, genomic context can influence the extent to which 5-  
137 aza-dC is effective as a demethylating agent. DNA sequence context, the distribution of transcription  
138 factor binding sites, and chromatin structure are known to influence the DNA methylation patterns  
139 produced by 5-aza-dC exposure (Mossman *et al.* 2010, Hagemann *et al.* 2011, Ramos *et al.* 2015).  
140 Although patterns of methylation differ among eukaryotes, the epigenetic modification itself is  
141 chemically identical. Here, we verify that 5-aza-dC influences patterns of methylation across the  
142 genome in *N. vitripennis*. Altered methylation patterns produced by 5-aza-dC exposure were non-  
143 random, with enrichment in genes associated with transcription-factor activity and sequence specific  
144 binding.

145

## 146 **Results**

147 Treatment with 5-aza-dC had wide-ranging effects on DNA methylation across the genome. First,  
148 samples clustered strongly by 5-aza-dC exposure regime at the gene-level in both t-SNE visualisation  
149 (Fig 1) and in principle component analyses (Fig 2), indicating that 5-aza-dC has a strong effect on the  
150 methylation of genes. Both analyses show strong clustering, and that wasps exposed to 5-aza-dC for  
151 24 hours are more like controls than wasps exposed to 5-aza-dC for 48 hours. In addition, the PCA  
152 analysis showed clear separation along PCA1 (which presumably is heavily associated with exposure

153 regime; Fig 2). Importantly though, this analysis also emphasises the extent of variation in response  
154 across the three treatment regimes, which is smallest for the controls, and largest for the 48 hour-  
155 exposed wasps (note the spread along PCA axis 2 in Fig 2). In addition, both cluster analyses placed  
156 the controls as some way intermediate between the two 5-aza-dC exposure treatments, which we  
157 consider further in the next two paragraphs. Both analyses also show that exposure regime dominated  
158 the clustering, over and above of any effects of either tissue-type (wasp heads vs bodies) or collection  
159 time (hours post-exposure), suggesting that this is the key effect. When we consider clustering at the  
160 level of individual CpG loci, clustering is much less obvious, using both t-SNE and PCA. However, the  
161 control treatment appears to cluster within the others in the t-SNE analyses, and the 24-hour and 48-  
162 hour treatments do separate to some extent, e.g. with the 24h samples more to the top and right of  
163 Fig S1 and the 48h samples more to the bottom and left (see Figs S1 and S2). The differences between  
164 the individual CpG and gene-level cluster analyses are likely to be due to a combination of low  
165 coverage and a greater stochasticity of methylation at the individual CpG level (see discussion).

166 Second, a more in-depth examination of the data using a generalised linear modelling (GLM)  
167 approach to examine differential methylation at the gene level found that 5-aza-dC exposure had a  
168 significant effect on the methylation status of the majority of genes examined; exposure treatment  
169 was significant as a main effect at an FDR level of 5% for 8,725 out of 11,582 genes, or 75.3% of genes  
170 (see also Fig S3). Moreover, both tissue-type and collection time also influenced methylation status  
171 across a large number of genes (significant as main effects in the GLMs for 3833 and 3566 genes  
172 respectively). Significant interactions between factors were also present for the majority of genes  
173 (exposure regime \* collection time = 10,776 genes, exposure regime \* tissue type = 10,484 genes,  
174 collection time \* tissue type = 5,364 genes, and exposure \* collection time \* tissue type = 10,484  
175 genes), showing widespread evidence for significant interplay between these factors. These results  
176 emphasise the context-dependent nature of the action of 5-aza-dC. Full results from the GLMs are  
177 presented in Table S1.

178 Interestingly, it appears that methylation tends to increase initially in response to exposure to  
179 5-aza-dC, an effect that is noticeable after 24h of exposure, before decreasing after 48h of exposure  
180 (Fig 3A). This means that the length of time individuals are exposed to the chemical may well influence  
181 what kind of methylation changes are observed; in other words, both hyper- and hypo-methylation  
182 can result from 5-aza-dC treatment. In terms of when wasps were collected after exposure, 3,566  
183 genes displayed significantly altered methylation in association with collection time, with a more  
184 pronounced decrease in methylation in samples collected 48h post-exposure relative to 24h post-  
185 exposure (when compared to 0h post-exposure; Fig 3B). This suggests that the effect of 5-aza-dC  
186 persists at least 48h after exposure has stopped. Finally, 3,833 genes displayed significantly altered

187 methylation patterns in association with tissue type (Fig 3C), with lower methylation overall in the  
188 head. However, we re-iterate that these main effects need to be contextualised within the pattern of  
189 widespread interactions seen in the data, with 91% of genes exhibiting a significant second-order  
190 interaction between exposure, tissue type and collection time.

191 Gene-set enrichment analysis, using *N. vitripennis* GO terms, when genes were ranked by their  
192 response to exposure regime is presented in Table S2. Broadly, we identified 169 significantly enriched  
193 GO terms ( $p < 0.05$ ), and 80 of these terms fell under the “Biological process” (BP) category, 18 under  
194 “Cellular component” (CC), and 71 under “Molecular function” (MF). The top five enriched GO terms  
195 were “sequence-specific DNA binding” (GO:0043565), “regulation of transcription, DNA templated”  
196 (GO:0006355), “ATP binding” (GO:0005524), “DNA binding transcription factor activity” (GO:  
197 0003700), and “protein kinase activity” (GO:0004672) (Table S2). When the analysis was repeated  
198 using GO terms for the *D. melanogaster* orthologs, a higher number of significantly enriched GO terms  
199 was obtained (700; 538 BP, CC 71, MF 91; Table S3). The top five GO terms for the *D. melanogaster*  
200 analysis were “nucleus” (GO:0005634), “positive regulation of transcription by RNA polymerase II”  
201 (GO:0045944), “regulation of Notch signalling pathway” (GO:0008593), “imaginal disc-derived wing  
202 morphogenesis” (GO:0007476), and, making a reappearance, “sequence-specific DNA binding”  
203 (GO:0043565). This analysis combined GO-terms when *N. vitripennis* genes had multiple *D.*  
204 *melanogaster* orthologs, which could lead to bias. However, we retrieve very similar enriched terms  
205 when we used only the GO terms that were shared between the multiple orthologs (Table S4),  
206 suggesting any bias caused by this approach is small.

207

## 208 **Discussion**

209 Our genome-wide analysis of CpGs across more than 11,000 genes showed that the demethylating  
210 agent 5-aza-dC has very widespread effects on patterns of DNA methylation in the *Nasonia vitripennis*  
211 genome. The methylome has been characterised in *Nasonia vitripennis* by Wang *et al.* (2013) and  
212 Beeler *et al.* (2014), and in common with other insect species, DNA methylation appears to be  
213 primarily associated with gene bodies (including intron-exon boundaries), and a rather low proportion  
214 of CpGs are methylated. As mentioned above, previous work that has attempted to confirm the effects  
215 of 5-aza-dC on DNA methylation have had mixed results. Pegoraro *et al.* (2016) confirmed the effects  
216 of 5-aza-dC across five genes (four via a qPCR MethylQuant assay and one via cloning a fragment of  
217 the *msn* gene from treated versus untreated individuals), whilst Ellers *et al.* (2019) have recently failed  
218 to show any effects of 5-aza-dC on the methylation status of 155 CpGs across nine genes (they used  
219 high-throughput bisulfite amplicon sequencing (BSAS); see Redshaw *et al.* (2014) for a discussion of

220 different methylation quantification assays). Our larger-scale study has both confirmed the action of  
221 5-aza-dC as a disruptor of methylation in *Nasonia*, but also suggested why it might be so difficult to  
222 pin down those effects. In particular, we find that whilst we see statistically significant main effects of  
223 exposure regime on DNA methylation (which includes differences in length of exposure), we also see  
224 effects of tissue type (albeit at the crude level of heads versus bodies), and time since exposure to 5-  
225 aza-dC. Moreover, we also see many statistically significant interactions between these factors; all  
226 told, the action of 5-aza-dC is likely to be context-dependent, both in terms of the sequences more  
227 likely to be targeted but also in terms of the experimental details, including target tissues.  
228 Nonetheless, our results strongly suggest that 5-aza-dC is not chemically inert in terms of influencing  
229 DNA methylation in *Nasonia* – indeed, quite the opposite.

230 That the effects of 5-aza-dC are non-random in terms of the genes it influences are further  
231 confirmed by our gene ontology enrichment analyses. We see enrichment for genes associated with  
232 DNA binding, regulation of transcription, and transcription factor activity. These processes are of  
233 interest given that we might expect the regulation of transcription to be a crucial component of the  
234 epigenetic role of DNA methylation, especially given what we know from both mammals and insects,  
235 even though the targets (throughout the genome versus exons) and outcomes (transcriptional  
236 silencing versus stable gene expression) are typically different in the two taxa. Our analysis certainly  
237 confirms the sequence-specific action of 5-aza-dC seen in other species.

238 A further important effect we see is that 5-aza-dC exposure can result in hyper-methylation  
239 as well as hypo-methylation. This means that the characterisation of 5-aza-dC as a strictly  
240 demethylating agent may be somewhat misleading. The complexity of outcomes of 5-aza-dC in  
241 mammals, in particular in terms of trying to understand its action for cancer treatments, is becoming  
242 increasingly well-appreciated (Seelan *et al.* 2018). As such, our data confirm in an insect what is being  
243 seen in mammalian cells. We are not well placed to speculate on the mechanism(s) by which 5-aza-dC  
244 may lead to hyper-methylation (see instead Seelan *et al.* 2018), even though its hypomethylating  
245 effect is well characterised chemically (see Introduction). However, if 5-aza-dC disrupts the regulation  
246 of the DNA methylation machinery itself, for instance in terms of how the Dnmt genes are expressed  
247 and act, then the downstream outcomes could be both hyper- and hypo-methylation. Perhaps related  
248 to this, in their study of DNA methylation and the control of the diapause response in *Nasonia*,  
249 Pegoraro *et al.* (2016) used both 5-aza-dC and RNA interference (RNAi) to manipulate methylation, in  
250 the latter case disrupting DNA methylation by knocking down both Dnmt1a and Dnmt3. Whilst both  
251 exposure to 5-aza-dC and the RNAi constructs affected how diapause was influenced by exposure to  
252 short or long day-length, they did so in different ways. Whilst both manipulations abolished the day-  
253 length response, the RNAi of Dnmt1a and Dnmt3 resulted in a change in how wasps responded to



254 long-day length (increasing the diapause response), whilst 5-aza-dC led to a change in response to  
255 short-day length (decreasing the diapause response). As such, different manipulations of DNA  
256 methylation may lead to different phenotypic outcomes, depending on the regulatory causes and  
257 consequences of the methylation pattern itself. More generally then, it is clear that much remains to  
258 be elucidated in how 5-aza-dC shapes methylation patterns, in both insects and mammals.

259 On a more technical note, perhaps unsurprisingly we found more significant genes in the GO  
260 enrichment analysis using the GO terms for *Drosophila melanogaster* orthologs. This is perhaps  
261 because of the more detailed gene ontology information available for the *D. melanogaster* genome.  
262 Nonetheless, the two analyses provide a similar story in terms of GO enrichment. In addition, the  
263 majority of our analyses were undertaken at the level of the gene. Perhaps given the variation in  
264 coverage at the level of individual CpGs, the clustering analyses were not by any means as clear cut as  
265 the gene-level results. However, in the t-SNE analysis (Fig S1), the control replicates cluster together,  
266 albeit within the broader distribution of the other two exposure treatment groups. The effect of  
267 genomic and sequence context may be particularly relevant here: our analysis at the level of the gene  
268 (see Methods for details) brings together CpGs that share a lot of context, by virtue of being associated  
269 with a given genetic locus. The differences in the clustering at the individual CpG versus gene levels  
270 may therefore represent the fact that the action of 5-aza-dC does appear to be non-random, and that  
271 we gain clarity when we consider closely associated CpGs whose patterns of methylation, and  
272 responses to 5-aza-dC, are more similar than randomly chosen CpGs across the genome.

273 In conclusion, our results suggest that 5-aza-dC remains a potential tool for evolutionary  
274 ecologists wishing to explore how DNA methylation influences phenotypic expression. As with all  
275 genomic approaches however, no one approach gives all the answers. 5-aza-dC may prove a very  
276 useful, if rather blunt, tool for first assessing the range of phenotypes that are influenced by  
277 methylation status, whilst no doubt more targeted knock-downs and genetic manipulations will be  
278 needed to link phenotypes to causal CpGs.

279

## 280 **Materials and Methods**

### 281 *Study species*

282 *Nasonia vitripennis* (Hymenoptera, Chalcidoidea) is a generalist parasitoid of large dipteran pupae  
283 including species of Calliphoridae. Females oviposit between 20 and 50 eggs in an individual host, with  
284 male offspring emerging just before females (after approximately 14 d at 25 °C: Whiting 1967). Males  
285 are brachypterous and unable to fly, remaining close to the emergence site where they compete with

286 each other for emerging females, including their sisters. Females disperse after mating to locate new  
287 hosts. The females used in this experiment were from the wild-type AsymC strain, originally isolated  
288 in 1986 by curing the wild-type strain LabII of *Wolbachia*. Wasps have been maintained on *Calliphora*  
289 *vomitorea* or *C. vicina* hosts at 25 °C, 16L:8D light conditions ever since, and AsymC is also the reference  
290 genome strain (Werren *et al.* 2010). The quantitative genetic basis of sex ratio variation has been  
291 repeatedly quantified (Pannebakker *et al.* 2008, 2011), whilst whole-genome transcription studies  
292 have confirmed that facultative sex allocation takes place without discernible changes in gene  
293 expression (Cook *et al.* 2015b, 2018).

294

#### 295 *5-aza-2'-deoxycytidine*

296 We used 5-aza-dC (Sigma Aldrich Company Ltd., Gillingham, UK) at a non-lethal concentration (10 µM).  
297 Widely used in epigenetic anticancer treatments (Seelan *et al.* 2018), 5-aza-dC is a nucleoside  
298 analogue that works by inhibiting DNA methyltransferase activity (Piskala and Sorm 1964, Jones and  
299 Taylor 1980, Momparler 1985, Christman 2002). When initially introduced to a cell, 5-aza-dC is  
300 essentially inert but is then converted by processes inherent in the cell to its active form 5-aza-dCTP  
301 (Seelan *et al.* 2018). This active form is readily incorporated into DNA during S-phase of the cell cycle  
302 in the place of cytosine. In the daughter strands arising from a replication event, DNA  
303 methyltransferase 1 (Dnmt1) will attempt to restore the patterns of methylation that were present in  
304 the parent strand. However, Dnmt1 becomes irreversibly bound to the 5-aza-dCTP residues in the  
305 daughter strands, resulting in a diminishing pool of Dnmt1. Thus, administering 5-aza-dC results in a  
306 passive loss of DNA methylation, the key effect of 5-aza-dC (for a fuller description, see Cook *et al.*  
307 2019).

308

#### 309 *Experimental design*

310 To control for possible host and other maternal effects, experimental females were not drawn straight  
311 from stock populations. Instead, two-day-old, mated, wild-type AsymC females were isolated from  
312 the mass cultures into individual glass vials. Each female was provided with three hosts and allowed  
313 to oviposit. Experimental females were drawn from the F1 generation, two days after emergence, one  
314 female per “grandmother”. We then employed a three by three factorial design whereby females  
315 were allocated to one of three 5-aza-dC exposure regimes and were harvested post-feeding at three  
316 time points. Exposure regimes were a) 20% sucrose for 24h, b) 20% sucrose supplemented with 10  
317 µM 5-aza-dC for 24h and c) 20% sucrose supplemented with 10 µM 5-aza-dC for 48h. For each of the

318 three regimes, females were harvested at 0, 24 or 48h post-exposure. Throughout the experiment,  
319 females were kept individually in glass vials and incubated at 25 °C, 16L :8D. Solutions (200 µl) were  
320 provided in the lid of a 2 ml microcentrifuge tube. For individuals exposed to 5-aza-dC for 48 h, the  
321 solutions were topped up by 100µl half-way through the exposure period to compensate for  
322 evaporation. All solutions were stained green with food colouring such that a subset of 10 females  
323 from each treatment combination could be dissected to check that feeding had occurred. At the point  
324 of harvest, females were flash-frozen in liquid nitrogen and stored at -80 °C prior to DNA extraction.

325

### 326 *DNA extraction and bisulphite-conversion*

327 Prior to DNA extraction, individuals were removed from -80 °C storage and heads were quickly excised  
328 from bodies using a sterile scalpel and a cryoloyer to keep samples cold. Heads (and likewise bodies)  
329 from the same treatment combination were randomly pooled into groups of 10 to give a maximum of  
330 3 biological replicates for each treatment combination giving a total of 54 DNA samples. Briefly, tissue  
331 was homogenised using a micropestle in 350 µl CTAB (Hexadecyltrimethylammonium Bromide) buffer  
332 with subsequent overnight proteinase K digestion (400 µg) at 56 °C. Samples were cooled to room  
333 temperature prior to RNase A digestion for 1 hour at 37 °C. A chloroform: isoamyl-alcohol wash (300  
334 µl) was performed twice before ethanol/sodium acetate precipitation of the DNA. DNA purity was  
335 analysed using the Nanodrop spectrophotometer with all samples having a 260/280 ratio of  $\geq 1.8$ . DNA  
336 integrity was confirmed using agarose gel electrophoresis.

337

### 338 *Bisulphite sequencing*

339 Bisulphite conversion, library preparation and sequencing were carried out by Edinburgh Genomics.  
340 Briefly, bisulphite conversion was carried out using the EZ DNA Methylation Kit (Zymo Research, Irvine  
341 USA), designed to reduce template degradation during the harsh bisulphite treatment whilst ensuring  
342 complete conversion of the DNA. Library preparation was carried out using the TruSeq DNA  
343 methylation Kit which takes the single-stranded DNA that results from bisulphite treatment and  
344 converts it into an Illumina sequencing library. Sequencing of bisulphite-treated DNA was carried out  
345 on the Illumina HiSeq 2500 in high output mode with 125bp paired-end reads. Library preparation  
346 failed for three of the samples due to low levels of input DNA, leaving only two biological replicates  
347 for three out of 18 treatment combinations and a total of 51 Bisulphite-sequenced samples (Table 1).

348

### 349 *Raw data processing*

350 Initial data processing was carried out by Edinburgh Genomics. Briefly, reads were trimmed using  
351 Cutadapt version 1.12 removing any adapter sequences and for quality using a threshold of 30. After  
352 trimming reads were required to have a minimum length of 50 bp. *Nasonia vitripennis* genome version  
353 2.1 and the associated annotation, available for download at Ensembl  
354 ([http://metazoa.ensembl.org/Nasonia\\_vitripennis/Info/Index](http://metazoa.ensembl.org/Nasonia_vitripennis/Info/Index)), were used as a reference. Reads were  
355 aligned to the reference genome using Bismark (version 0.16) with the parameter “bowtie2”. PCR  
356 duplicates were removed from the resulting BAM files using samtools with the parameter “view -F  
357 1024”. Data for each CpG was then extracted from the BAM files using the Bioconductor package  
358 methylKit (version 0.99.3) with R (version 3.3.1; R Core Team 2017). The methylation status of each  
359 CpG for all samples was calculated using the function “processBismarkAIn” using the default  
360 parameters, except “min.cov=1 no;ap=TRUE”, which excludes CpG’s not covered by any reads across  
361 all samples and does not count CpGs covered by overlapping ends of a paired read as covered twice.  
362 The 1% of bases with the highest coverage were removed using the function “filterByCoverage” to  
363 eliminate potential PCR bias. After initial processing as outlined above, the raw data comprised  
364 percentage methylation at 4,150,376 CpG loci (no. of reads in which the CpG is methylated/total no.  
365 of reads covering the CpG) for each of 51 samples. CpG read counts were then summed by gene,  
366 (including 1Kb up and downstream) using gene annotation from Ensembl (version 2.1. available from:  
367 [ftp://ftp.ensemblgenomes.org/pub/metazoa/release-40/gff3/nasonia\\_vitripennis](ftp://ftp.ensemblgenomes.org/pub/metazoa/release-40/gff3/nasonia_vitripennis)). Around half  
368 (2,119,643) of the CpG’s in the full dataset fell within genic regions with 14,765/17,279 genes (85%)  
369 having at least one CpG present. Median coverage across the whole experiment (N = 51 BS-seq  
370 libraries) was 898X, but coverage was heterogeneous between loci (Fig 4) and samples (Table S5).  
371 Mean read coverage per sample ranged from 2.6X to 48.2X. Four samples had less than 10X mean  
372 coverage per CpG, however, these samples were distributed across treatment groups.

373

### 374 *Statistical analysis*

375 The overall structure of our dataset in terms of the proportion of methylated reads per gene and per  
376 loci was visualised with two complementary analyses: a principle component analysis (PCA), which  
377 allows samples to be visualised in relation to the two major axes of variation in our experiment, and a  
378 T-distributed Stochastic Neighbour Embedding (t-SNE) analysis. t-SNE is a machine-learning algorithm  
379 for data visualisation well-suited for high-dimensional datasets (van der Maaten and Hinton 2008).  
380 The PCA was conducted using the R base function prcomp with default values. To perform the t-SNE  
381 analysis we used the R package Rtsne (Krijthe 2015), with default values and perplexity set to 15. For

382 the PCA and t-SNE analyses any genes or loci with 0 coverage in any one sample were discarded prior  
383 to analysis.

384 To examine the effect of 5-aza-dC exposure on individual genes, we modelled the number of  
385 methylated and unmethylated reads from a gene as a generalized linear model (GLM) with a binomial  
386 distribution with the following terms: exposure, tissue-type, collection time and their interactions.  
387 Genes with 0 coverage for all samples in any particular treatment group were excluded from our  
388 analysis (leaving a total of 11582 genes). Significance of each term was determined by a likelihood  
389 ratio test, which was corrected for multiple testing using Benjamini and Hochberg's algorithm  
390 (Benjamini and Hochberg 1995), with statistical significance set to 5%. Coefficients (log odds of  
391 methylation) for each term were extracted from the full model. All statistical analyses were conducted  
392 in R (v. 3.4.1; R Core Team 2017).

393

#### 394 *Functional enrichment*

395 *N. vitripennis* GO-terms were downloaded from "hymenopteramine"  
396 (<http://hymenopteragenome.org/hymenopteramine/begin.do>) on 27<sup>th</sup> September 2018. In addition,  
397 we used hymenopteramine to firstly obtain *D. melanogaster* orthologs for each *N. vitripennis* gene,  
398 from which we could then obtain the associated *D. melanogaster* GO terms. We used both of these  
399 GO-term sets for enrichment analyses (below). Some *N. vitripennis* genes had multiple *D.*  
400 *melanogaster* orthologs. In these cases, all GO-terms from each *D. melanogaster* ortholog were  
401 combined together. To ensure this did not bias our results we repeated our analyses, but instead of  
402 combining GO-terms we kept only GO-terms that were shared between all orthologs.

403 To examine which processes are most affected by 5-aza-dC exposure, we conducted gene set  
404 enrichment analyses using the R package TopGO (v. 2.28.0; Rahnenfuhrer 2016) using the elim  
405 algorithm to account for the GO topology. Gene set enrichment analyses identify enriched GO terms  
406 in a threshold-free way, by finding GO-terms that are overrepresented at the top of a ranked list of  
407 genes. Here we ranked genes by FDR for the exposure effect. GO terms were considered to be  
408 significantly enriched when  $p < 0.05$ .

409

#### 410 **Acknowledgments**

411 This work was initiated as part of NERC grant NE/J024481/1. We are very grateful to Mark Lammers  
412 and Jacintha Ellers for their collegiate and constructive engagement with our previous DNA

413 methylation work. We are also grateful to Matthew Arno and the Edinburgh Genomics team for  
414 their sequencing and downstream support. Raw data are available from the Gene Expression  
415 Omnibus hosted by the National Center for Biotechnology Information (Accession: GSE125388).  
416 Scripts for the analyses in this paper are available at: <https://github.com/DarrenJParker/5-Aza->  
417 dC\_methylation.

418

419

420

421

422

423

424

425

426

427

428

429

430

431

432

433

434

435

436

437

438

439

440

441

442

443

444 **Tables**

445 **Table 1. A summary of the experimental design<sup>a</sup>.**

| Treatment Combination | 5-aza-dC exposure regime     | Harvest time | Tissue type | No. replicates (1 x rep. = 1 pool of 10) |
|-----------------------|------------------------------|--------------|-------------|------------------------------------------|
| 1                     | 20% sucrose for 24 h         | 0h           | Bodies      | 3                                        |
| 2                     | 20% sucrose for 24 h         | 0h           | Heads       | 3                                        |
| 3                     | 20% sucrose for 24 h         | 24h          | Bodies      | 3                                        |
| 4                     | 20% sucrose for 24 h         | 24h          | Heads       | 3                                        |
| 5                     | 20% sucrose for 24 h         | 48h          | Bodies      | 3                                        |
| 6                     | 20% sucrose for 24 h         | 48h          | Heads       | 3                                        |
| 7                     | 10 $\mu$ M 5-aza-dC for 24 h | 0h           | Bodies      | 3                                        |
| 8                     | 10 $\mu$ M 5-aza-dC for 24 h | 0h           | Heads       | 3                                        |
| 9                     | 10 $\mu$ M 5-aza-dC for 24 h | 24h          | Bodies      | 3                                        |
| 10                    | 10 $\mu$ M 5-aza-dC for 24 h | 24h          | Heads       | 2                                        |
| 11                    | 10 $\mu$ M 5-aza-dC for 24 h | 48h          | Bodies      | 3                                        |
| 12                    | 10 $\mu$ M 5-aza-dC for 24 h | 48h          | Heads       | 2                                        |
| 13                    | 10 $\mu$ M 5-aza-dC for 48 h | 0h           | Bodies      | 3                                        |
| 14                    | 10 $\mu$ M 5-aza-dC for 48 h | 0h           | Heads       | 2                                        |
| 15                    | 10 $\mu$ M 5-aza-dC for 48 h | 24h          | Bodies      | 3                                        |
| 16                    | 10 $\mu$ M 5-aza-dC for 48 h | 24h          | Heads       | 3                                        |
| 17                    | 10 $\mu$ M 5-aza-dC for 48 h | 48h          | Bodies      | 3                                        |
| 18                    | 10 $\mu$ M 5-aza-dC for 48 h | 48h          | Heads       | 3                                        |

446 <sup>a</sup> Female wasps were exposed to 1 of 3 5-aza-dC exposure regimes including a control. Females were  
447 then harvested at 1 of 3 timepoints after the exposure period heads were excised from bodies to  
448 give a degree of tissue-specificity to the analysis. Three biological replicates were available for  
449 almost all treatment combinations with each biological replicate consisting of tissue from three *N.*  
450 *vitripennis* females.

451

452

453 **Figures**

454

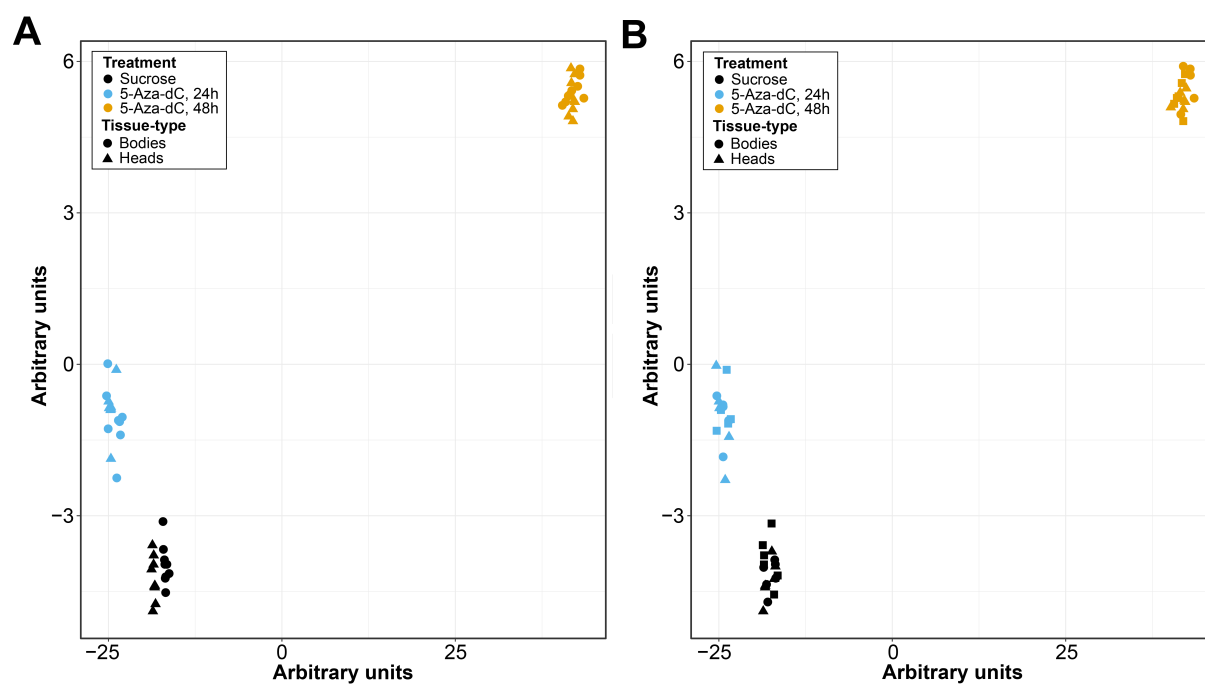

455

456 **Fig 1. t-SNE of the proportion of methylated reads per gene.** Shows the effects of (A) Exposure  
457 regime and tissue type and (B) Exposure regime and harvest time.

458

459



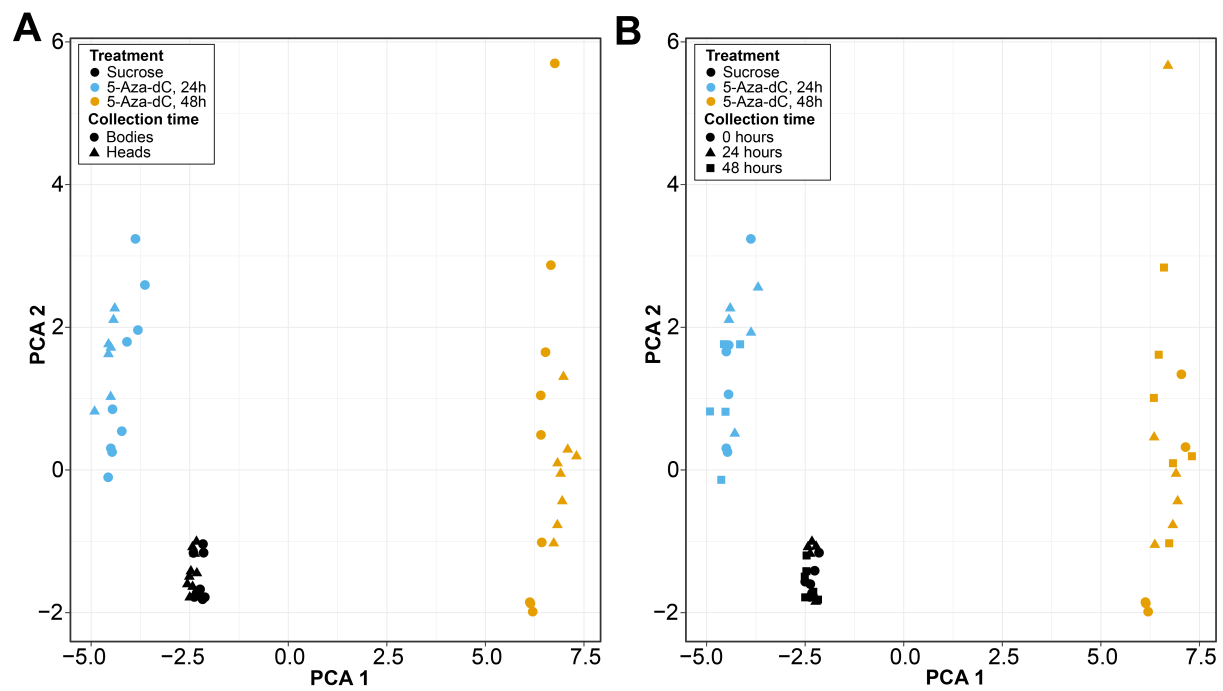

460

461 **Fig 2. PCA of the proportion of methylated reads per gene.** Shows the effects of (A) Exposure regime  
462 and tissue type and (B) Exposure regime and harvest time.

463

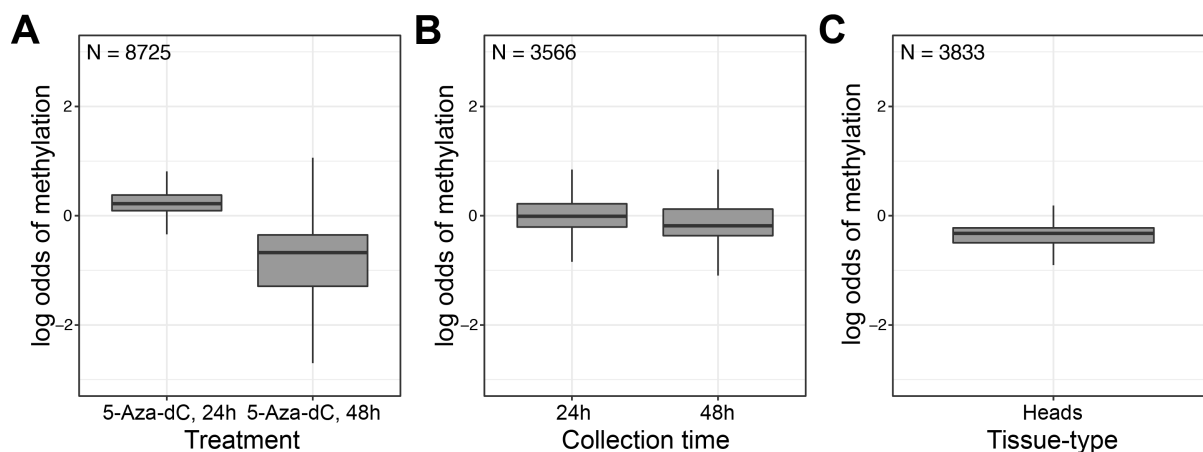

464

465 **Fig 3. Gene methylation status displayed as log odds of methylation for each main effect in the**  
466 **experiment.** A significant effect on gene methylation status was noted in response to (A) 5-aza-dC  
467 exposure regime (relative to sucrose control), (B) harvest time after exposure (relative to zero hours)  
468 and (C) tissue-type (heads relative to bodies). N= number of genes with significantly differentially  
469 methylated CpGs in association with each main effect.

470

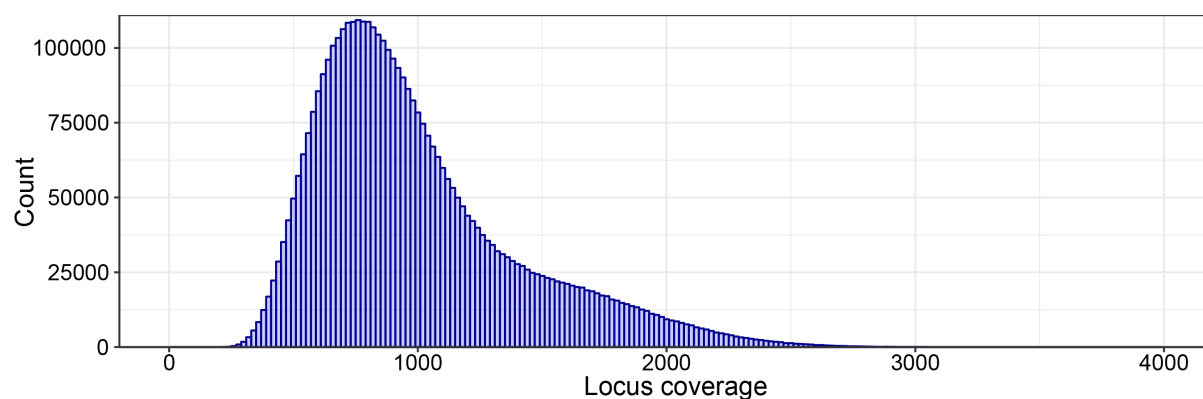

471

472 **Fig 4. Read coverage by locus across all 51 BS-Seq libraries.**

473

474

475

## 476 References

- 477 Amarasinghe HE, Clayton CI, Mallon EB. 2014. Methylation and worker reproduction in the bumble-  
478 bee (*Bombus terrestris*). *Proc R Soc Lond B Biol Sci.* 281: 20132502.
- 479
- 480 Ashbrook DG, Mulligan MK, Williams RW. 2018. Post-genomic behavioural genetics: From revolution  
481 to routine. *Genes Brain Behav.* 17: e12441.
- 482
- 483 Beeler SM, Wong GT, Zheng JM, Bush EC, Remnant EJ, Oldroyd DP, Drewell RA. 2014. Whole-genome  
484 DNA methylation profile of the Jewel Wasp (*Nasonia vitripennis*). *G3 (Bethesda)* 4: 383-388.
- 485
- 486 Benjamini Y, Hochberg Y. 1995. Controlling the false discovery rate: A practical and powerful approach  
487 to multiple testing. *J R Stat Soc Series B Stat Methodol.* 57: 289–300.
- 488
- 489 Bewick AJ, Vogel KJ, Moore AJ, Schmitz RJ. 2017. Evolution of DNA methylation across Insects. *Mol*  
490 *Biol Evol.* 34: 654-665.
- 491
- 492 Biémont C. 2010. From genotype to phenotype. What do epigenetics and epigenomics tell us?  
493 *Heredity* 105: 1-3.
- 494
- 495 Bonduriansky R, Day T. 2009. Nongenetic inheritance and its evolutionary implications. *Annu Rev Ecol*  
496 *Evol Syst.* 40: 103-125.
- 497
- 498 Bonduriansky R, Day T. 2018. *Extended Heredity*. Princeton: Princeton University Press.
- 499
- 500 Bryan J, Kantarjian H, Garcia-Manero G, Jabbour E. 2011. Pharmacokinetic evaluation of decitabine for  
501 the treatment of leukemia. *Expert Opin Drug Metab Toxicol.* 7: 661-672.
- 502
- 503 Burggren W. 2016. Epigenetic Inheritance and its role in evolutionary biology: re-evaluation and new  
504 perspectives. *Biology.* 5: 24.
- 505
- 506 Burton-Chellew MN, Koevoets T, Grillenberger BK, Sykes EM, Underwood SL, Bijlsma K, Gadau J, van  
507 de Zande L, Beukeboom LW, West SA, *et al.* 2008. Facultative sex ratio adjustment in natural  
508 populations of wasps: cues of local mate competition. *Am Nat.* 172: 393-404.
- 509
- 510 Christman JK. 2002. 5-azacytidine and 5-aza-2'-deoxycytidine as inhibitors of DNA methylation:  
511 mechanistic studies and their implications for cancer therapy. *Oncogene* 21: 5483-5495.
- 512
- 513 Constancia M, Hemberger M, Hughes J, Dean W, Ferguson-Smith A, Fundele R, Stewart F, Kelsey G,  
514 Fowden A, Sibley C, *et al.* 2002. Placental-specific IGF-II is a major modulator of placental and fetal  
515 growth. *Nature* 417(6892): 945-948.
- 516
- 517 Cook N, Pannebakker BA, Tauber E, Shuker DM. 2015a. DNA methylation and sex allocation in the  
518 parasitoid wasp *Nasonia vitripennis*. *Am Nat.* 186: 513-518.
- 519
- 520 Cook N, Trivedi U, Pannebakker BA, Blaxter M, Ritchie MG, Tauber E, Sneddon T, Shuker DM. 2015b.  
521 Oviposition but not sex allocation is associated with transcriptomic changes in females of the  
522 parasitoid wasp *Nasonia vitripennis*. *G3 (Bethesda)* 5: 2885-2892.
- 523
- 524 Cook N, Boulton RA, Green J, Trivedi U, Tauber E, Pannebakker BA, Ritchie MG, Shuker DM. 2018.  
525 Differential gene expression is not required for facultative sex allocation: a transcriptome analysis of  
526 brain tissue in the parasitoid wasp *Nasonia vitripennis*. *Roy Soc Open Sci.* 5: 171718.

527  
528 Cook N, Parker DJ, Tauber E, Pannebakker BA, Shuker DM. 2019. Validating the demethylating effects  
529 of 5-aza-2'-deoxycytidine in insects requires a whole-genome approach (A reply to Ellers *et al.*). *Am*  
530 *Nat.* Forthcoming.  
531  
532 Ellers J, Visser M, Mariën J, Kraaijeveld K, Lammers M. 2019. The importance of validating the  
533 demethylating effect of 5-aza-dC in model species. *Am Nat.* Forthcoming.  
534  
535 Feng S, Cokus SJ, Zhang X, Chen P, Bostick M, Goll MG, Hetzel J, Jain J, Strauss SH, Halpern ME, *et al.*  
536 2010. Conservation and divergence of methylation patterning in plants and animals. *Proc Natl Acad*  
537 *Sci USA.* 107: 8689-8694.  
538  
539 Glastad KM, Hunt BG, Yi SV, Goodisman MAD. 2011. DNA methylation in insects: on the brink of the  
540 epigenomic era. *Insect Mol Biol.* 20: 553-65.  
541  
542 Hagemann S, Heil O, Lyko F, Brueckner B. 2011. Azacytidine and decitabine induce gene-specific and  
543 non-random DNA demethylation in human cancer cell lines. *PLoS One.* 6: e17388.  
544  
545 Haig D. 1997. Parental antagonism, relatedness asymmetries and genomic imprinting. *Proc R Soc Lond*  
546 *B Biol Sci.* 264: 1657-1662.  
547  
548 Haig D. 2002. Genomic imprinting and kinship. New Brunswick: Rutgers University Press.  
549  
550 Hamilton WD. 1967. Extraordinary sex ratios. *Science* 156: 477-488.  
551  
552 Jones PA, Taylor SM. 1980. Cellular differentiation, cytidine analogs and DNA methylation. *Cell* 20: 85-  
553 93.  
554  
555 Krijthe JH. 2015. Rtsne: T-Distributed Stochastic Neighbor Embedding using a Barnes-Hut  
556 Implementation. Available from: <https://github.com/jkrijthe/Rtsne>  
557  
558 Kucharski R, Maleszka J, Foret S, Maleszka R. 2008. Nutritional control of reproductive status in  
559 honeybees via DNA methylation. *Science* 319: 1827-1830.  
560  
561 Lind MI, Spagopoulou F. 2018. Evolutionary consequences of epigenetic inheritance. *Heredity.* 121:  
562 205-209.  
563  
564 Lyko F, Foret S, Kucharski R, Wolf S, Falckenhayn C, Maleszka R. 2010. The honey bee epigenomes:  
565 differential methylation of brain DNA in queens and workers. *PLoS Biol.* 8: e1000506.  
566  
567 Lyko F. The DNA methyltransferase family: a versatile toolkit for epigenetic regulation. 2018. *Nat Rev*  
568 *Genet.* 19: 81-92.  
569  
570 Momparler RL. Molecular, cellular and animal pharmacology of 5-aza-2'-deoxycytidine. 1985.  
571 *Pharmacol Ther.* 30: 287-299.  
572  
573 Momparler RL. 2012. A perspective on the comparative antileukemic activity of 5-aza-2'-deoxycytidine  
574 (Decitabine) and 5-azacytidine (Vidaza). *Pharmaceuticals (Basel).* 5: 875-881.  
575  
576 Moore T, Haig D. 1991. Genomic imprinting in mammalian development: a parental tug-of-war. *Trends*  
577 *Genet.* 7: 45-49.

578  
579 Mossman D, Kim K, Scott RJ. 2010. Demethylation by 5-aza-2'-deoxycytidine in colorectal cancer cells  
580 targets genomic DNA whilst promoter CpG island methylation persists. *BMC Cancer* 10: 366.  
581  
582 Pannebakker BA, Halligan DL, Reynolds KT, Ballantyne GA, Shuker DM, West SA. 2008. Effects of  
583 spontaneous mutation accumulation on sex ratio traits. *Evolution*. 62: 1921-1935.  
584  
585 Pannebakker BA, Watt R, Knott SA, West SA, Shuker DM. 2011. The quantitative genetic basis of sex  
586 ratio variation in *Nasonia vitripennis*: a QTL study. *J Evol Biol*. 24: 12-22.  
587  
588 Patten MM, Ross L, Curley JP, Queller DC, Bonduriansky R, Wolf JB. 2014. The evolution of genomic  
589 imprinting: theories, predictions and empirical tests. *Heredity* 113: 119-128.  
590  
591 Pegoraro M, Bafna A, Davies NJ, Shuker DM, Tauber E. 2016. DNA methylation changes induced by  
592 long and short photoperiods in *Nasonia*. *Genome Res*. 26: 203-210.  
593  
594 Piskala, Sorm F. 1964. Nucleic acid components and their analogues. LI. Synthesis of 1-glycosyl  
595 derivatives of 5-azauracil and 5-azacytosine. *Collect Czechoslov Chem Commun*. 29: 2060-2076.  
596  
597 R Core Team. 2017. R: A language and environment for statistical computing. R Foundation for  
598 Statistical Computing, Vienna, Austria. Available from <https://www.R-project.org>  
599  
600 Rahnenfuhrer AAJ. 2016. *topGO: Enrichment Analysis for Gene Ontology*. R package version 2.28.0.  
601 Available from <http://bioconductor.org/packages/release/bioc/html/topGO.html>  
602  
603 Ramos M, Wijetunga NA, McLellan AS, Suzuki M, Greally JM. 2015. DNA demethylation by 5-aza-2'-  
604 deoxycytidine is imprinted, targeted to euchromatin and has limited transcriptional consequences.  
605 *Epigenetics Chromatin*. 8:11.  
606  
607 Redshaw N, Huggett JF, Taylor MS, Foy CA, Devonshire AS. 2014. Quantification of epigenetic  
608 biomarkers: an evaluation of established and emerging methods for DNA methylation analysis. *BMC*  
609 *Genomics* 15: 1174.  
610  
611 Schield DR, Walsh MR, Card DC, Andrew AL, Adams RH, Castoe TA. 2016. EpiRADseq: scalable analysis  
612 of genomewide patterns of methylation using next-generation sequencing. *Meth Ecol Evol*. 7: 60-69.  
613  
614 Seelan RS, Mukhopadhyay P, Pisano MM, Greene RM. 2018. Effects of 5-Aza-2'-deoxycytidine  
615 (decitabine) on gene expression. *Drug Metab Rev*. 50: 193-207.  
616  
617 Shuker DM, West SA. 2004. Information constraints and the precision of adaptation: sex ratio  
618 manipulation in wasps. *Proc Natl Acad Sci USA*. 101: 10363-10367.  
619  
620 Smith G, Smith C, Kenny JG, Chaudhuri RR, Ritchie MG. 2015. Genome-wide DNA methylation patterns  
621 in wild samples of two morphotypes of Threespine Stickleback (*Gasterosteus aculeatus*). *Mol Biol Evol*.  
622 32: 888-895.  
623  
624 Taylor PD, Bulmer MG. 1980. Local Mate Competition and the sex-ratio. *J Theoret Biol*. 86: 409-419.  
625 van der Maaten LJP, Hinton GE. 2008. Visualizing high-dimensional data using t-SNE. *J Mach Learn Res*.  
626 9: 2579-2605.  
627

- 628 Wang X, Wheeler D, Avery A, Rago A, Choi JH. 2013. Function and evolution of DNA methylation in  
629 *Nasonia vitripennis*. *PLoS Genet.* 9: e1003872.  
630
- 631 Wang X, Werren JH, Clark AG. 2016. Allele-specific transcriptome and methylome analysis reveals  
632 stable inheritance and cis-regulation of DNA methylation in *Nasonia*. *PLoS Biol.* 14: e1002500.  
633
- 634 Werren JH. 1980. Sex ratio adaptations to local mate competition in a parasitic wasp. *Science* 208:  
635 1157-1159.  
636
- 637 Werren JH. 1983. Sex ratio evolution under local mate competition in a parasitic wasp. *Evolution* 37:  
638 116-124.  
639
- 640 Werren JH, *et al.* 2010. Functional and evolutionary insights from the genomes of three parasitoid  
641 *Nasonia* species. *Science* 327: 343-348.  
642
- 643 West SA. 2009. Sex allocation. Princeton: Princeton University Press.  
644
- 645 Whiting AR. 1967. The biology of the parasitic wasp *Mormoniella vitripennis* [= *Nasonia brevicornis*]  
646 (Walker). *Q Rev Biol.* 42: 333-406.  
647
- 648 Wild G, West SA. 2008. Genomic imprinting and sex allocation. *Am Nat.* 173: E1-14.  
649
- 650 Zemach A, McDaniel IE, Silva P, Zilberman D. 2010. Genome-wide evolutionary analysis of eukaryotic  
651 DNA methylation. *Science* 328: 916-919.  
652
