# Supplementary material for: Genome-wide disruption of DNA methylation by 5-aza-2’-deoxycytidine in a parasitoid wasp
Source: bioRxiv or medRxiv preprint supplement (doi:10.1101/437202), 2019-05-12
Supplement: Supplementary file [file media-1.pdf]

1 **Supporting Information**

2

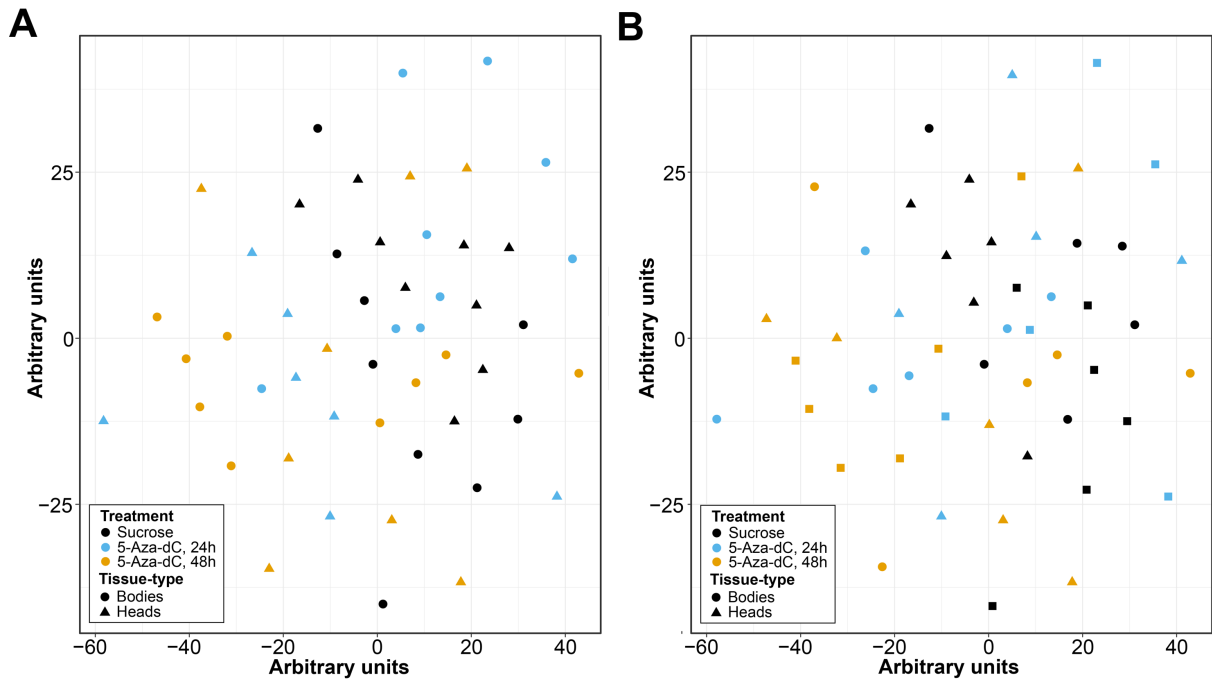

3

4 **Fig S1. t-SNE of the proportion of methylated reads per CpG locus.** Shows the effects of (A)  
5 Exposure regime and tissue type and (B) Exposure regime and harvest time.

6

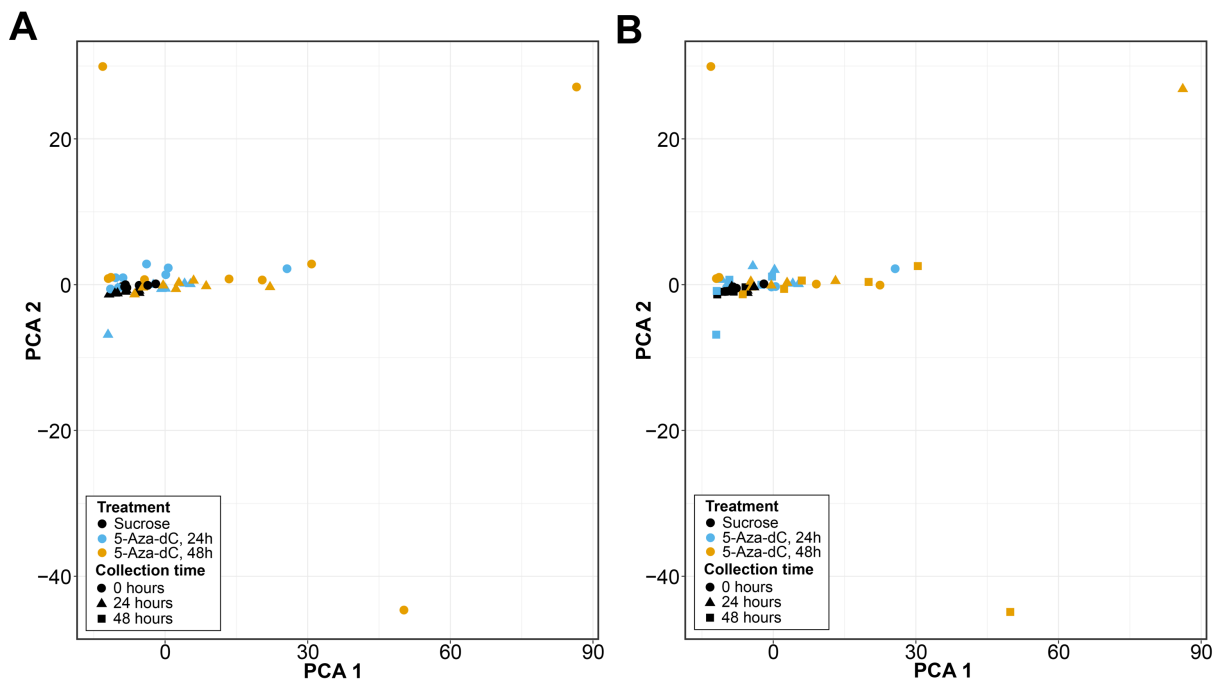

7

8 **Fig S2. PCA of the proportion of methylated reads per CpG locus.** Shows the effects of (A) Exposure  
9 regime and tissue type and (B) Exposure regime and harvest time.

10

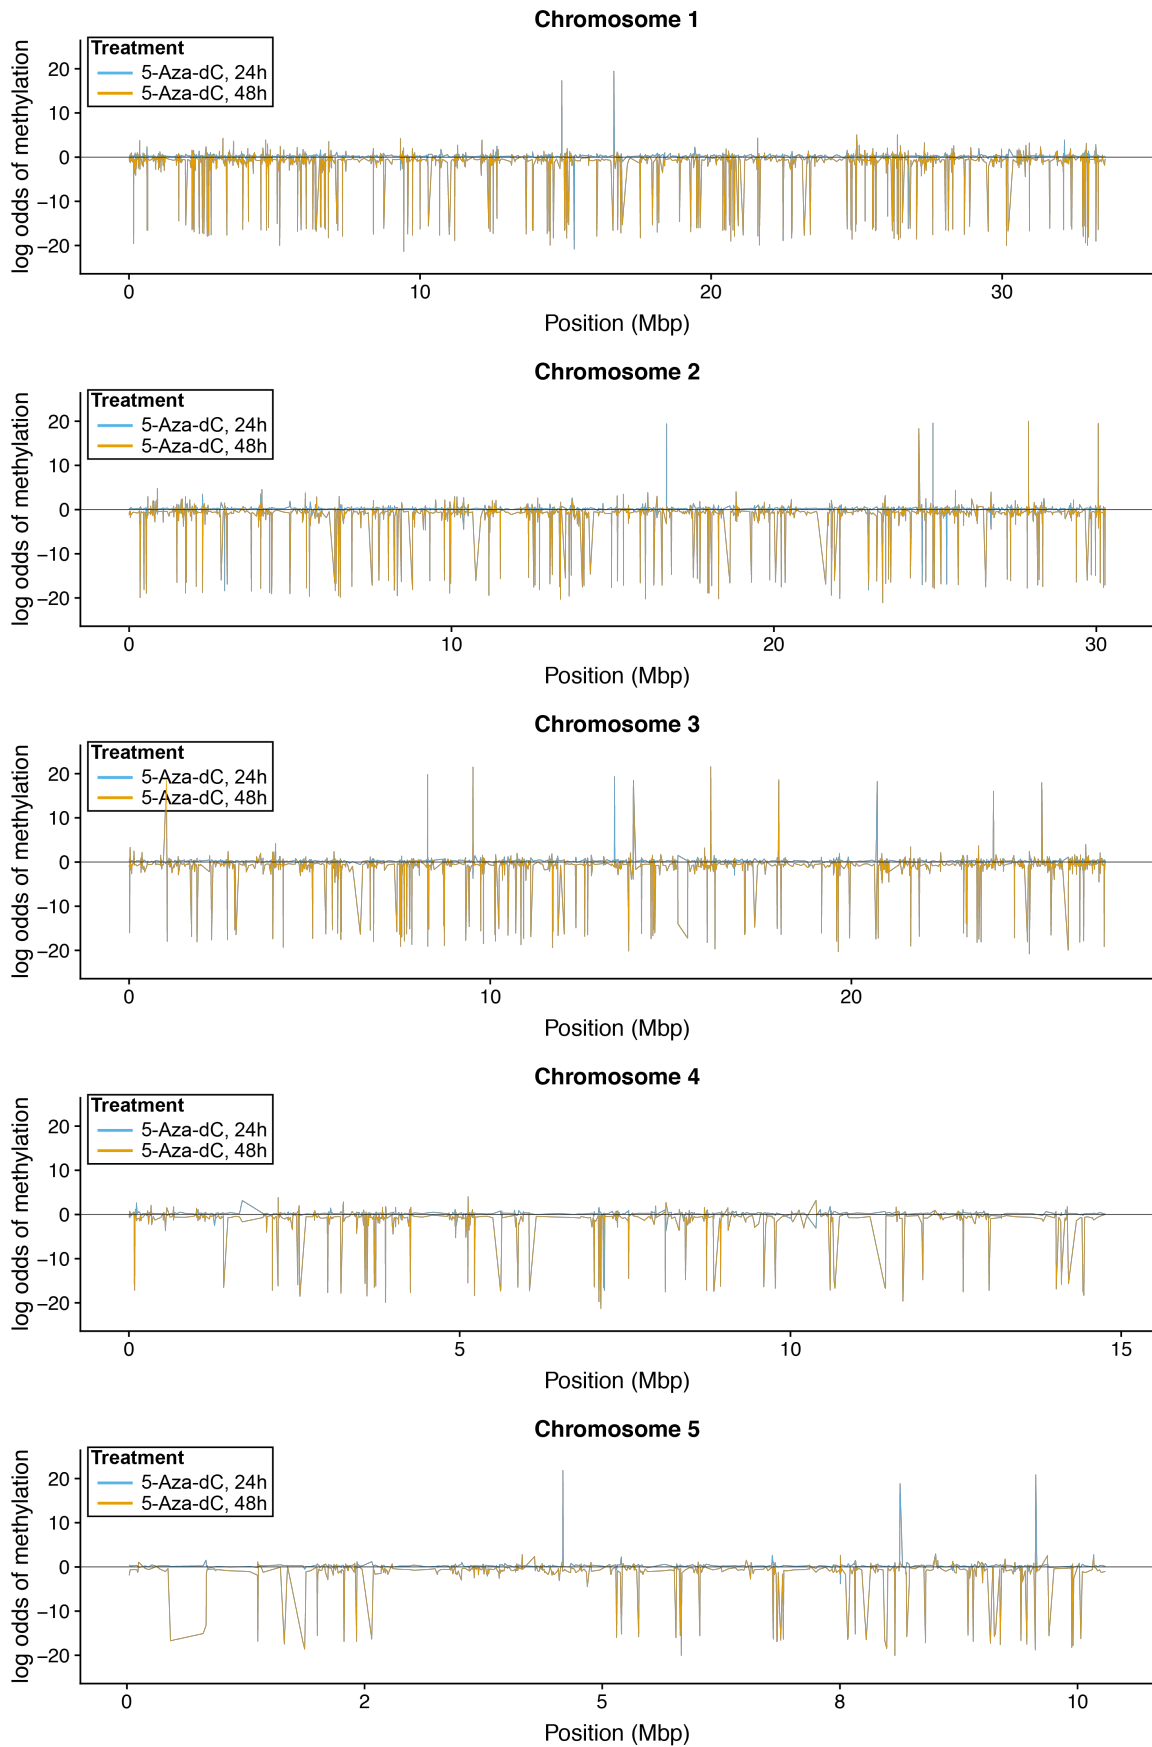

11

12 **Fig S3. Effect of 5-aza-dC exposure regime on gene methylation status (log odds of methylation)**  
 13 **for each gene ordered along each chromosome.**

- 14 **Table S1. Number of reads and coverage of each sample.**
- 15 **Table S2. Output of coefficients and significance values from the GLM analysis.**
- 16 **Table S3. Enriched GO terms for treatment using *Nasonia vitripennis* GO terms.**
- 17 **Table S4. Enriched GO terms for treatment using *D. melanogaster* GO terms, when GO-terms from**  
18 **multiple orthologs are combined together.**
- 19 **Table S5. Enriched GO terms for treatment using *D. melanogaster* GO terms, when only GO-terms**  
20 **which are the same are kept (when a *Nasonia vitripennis* gene has multiple *D. melanogaster***  
21 **orthologs).**
- 22
